1 **Title:**

2 Mechanical heterogeneity and roles of parallel microtubule arrays in governing meiotic spindle

3 length

4

5 **Authors:**

6 Jun Takagi<sup>1</sup> and Yuta Shimamoto<sup>1,2,\*</sup>

7

8 **Affiliations:**

9 <sup>1</sup>Center for Frontier Research, National Institute of Genetics, Yata 1111, Mishima, Shizuoka 411-  
10 8540, Japan

11 <sup>2</sup>Department of Genetics, School of Life Science, SOKENDAI University, Yata 1111, Mishima,  
12 Shizuoka 411-8540, Japan

13

14 \*Correspondence should be addressed to Y.S. (e-mail: yuta.shimamoto@nig.ac.jp)

15 **Abstract**

16 Metaphase spindles are arrays of microtubules whose architecture provides the mechanism for  
17 regulated force generation required for proper segregation of chromosomes during cell division.  
18 Whereas long-standing models are based on continuous antiparallel microtubule arrays  
19 connecting two spindle poles and overlapping at the equator, spindles typically possess a more  
20 complex architecture with randomly arranged short filaments. How these heterogeneous  
21 multifilament arrays generate and respond to forces has been mysterious, as it has not been  
22 possible to directly measure and perturb spindle force while observing relevant filament motility.  
23 Here, we combined microneedle-based quantitative micromanipulation with high-resolution  
24 microtubule tracking of *Xenopus* egg extract spindles to simultaneously examine the force and  
25 individual filament motility *in situ*. We found that the microtubule arrays at the middle of the  
26 spindle half are considerably weak and fluid-like, being more adaptable to perturbing forces as  
27 compared to those near the pole and the equator. We also found that a force altering spindle  
28 length induces filament translocation nearer the spindle pole, where parallel microtubules  
29 predominate, while maintaining equatorial antiparallel filaments. Molecular perturbations  
30 suggested that the distinct mechanical heterogeneity of the spindle emerges from activities of  
31 kinesin-5 and dynein, two key spindle motor proteins. Together, our data establish a link between  
32 spindle architecture and mechanics, and highlight the importance of parallel microtubule arrays  
33 in maintaining its structural and functional stability.

34 **Main Text:**

35 **Introduction**

36 Spindles are microtubule-based bipolar structures assembled to segregate chromosomes during  
37 cell division. Errors in chromosome segregation are linked to aneuploidy, the hallmark of cancer  
38 and several developmental disorders in humans (Gordon et al., 2012; Hassold and Hunt, 2001).  
39 Forces exerted by the spindle are essential, as they pull chromosomes, monitor erroneous  
40 attachment, and control spindle position in a cell (Dumont and Mitchison, 2009b; Inoue and  
41 Salmon, 1995). The forces generated in turn act on the spindle and influence its length and  
42 bipolarity, which ensure the distance over and axis along which chromosomes are segregated.  
43 Therefore, the structure must properly respond to these forces and maintain overall integrity.

44

45 Understanding the spindle mechanics requires knowing the internal filament architecture and  
46 dynamics, as well as how the arrays of the filaments generate and respond to force. In long-  
47 standing models, spindles are described as arrays of long, continuous microtubules radially  
48 growing from the opposite spindle poles and forming an antiparallel overlap at the equator  
49 (McIntosh et al., 1969; Mitchison and Salmon, 2001; Scholey et al., 2003). Although this  
50 relatively simple architecture has been widely observed in small spindles, such as those of yeast  
51 (Winey et al., 1995), studies of higher eukaryote spindles, including those of *Caenorhabditis*  
52 *elegans*, *Xenopus laevis*, and humans, revealed that the filament architecture in these species is  
53 much more complex. In particular, the minus-ends of many microtubules are not anchored to  
54 spindle poles but instead broadly distributed across the bipolar structure (Burbank et al., 2006;  
55 Mastronarde et al., 1993; Redemann et al., 2017). These individual filaments are short and span  
56 only part of the spindle, overlapping with each other to form a “tiled-array”-like arrangement

57 (Brugues et al., 2012; Yang et al., 2007). Within this architecture, individual microtubules grow  
58 toward either the left or the right spindle pole (Brugues et al., 2012), forming antiparallel as well  
59 as parallel filament arrays at varying spindle location. Thus, spindles are architecturally  
60 heterogeneous, in terms of filament position and relative filament polarity.

61

62 Consistent with this, the poleward flux – the persistent translocation of microtubule lattices  
63 characteristic of many metazoans (Ganem and Compton, 2006) – exhibits a non-uniform velocity  
64 distribution along the length of the spindle. In particular, the flux speed is substantially faster  
65 around the equator ( $\sim 2\text{-}3\ \mu\text{m}/\text{min}$ ) than nearer the pole ( $\sim 1\ \mu\text{m}/\text{min}$ ), which cannot be simply  
66 expected from continuous filament lattices spanning from the pole toward past the equator  
67 (Burbank et al., 2007; Yang et al., 2008). The poleward movement occurs with filament minus-  
68 ends leading (Mitchison, 2005). The dynamics is linked to activities of kinesin-5 and dynein, two  
69 key microtubule motors of opposite directionality. *In vitro*, kinesin-5 forms cross-bridges along  
70 overlapping microtubules and pushes apart antiparallel filaments (Kapitein et al., 2005). On the  
71 other hand, dynein is located at the filament minus-end and may counteract this motion (Tan et  
72 al., 2018).

73

74 Despite the wealth of information on filament architecture and dynamics, the forces in the  
75 spindle are poorly understood. This is because earlier studies have analyzed filament features in a  
76 static sample setting, such as one required in electron microscopy, or examined the dynamic  
77 samples using live cell methods, but without measuring force. Since Bruce Nicklas' seminal  
78 work (Nicklas, 1997), physical manipulation studies have directly examined spindle forces in  
79 cells (Garzon-Coral et al., 2016; Hiramoto and Nakano, 1988; Skibbens and Salmon, 1997);

80 however, the assays used in these studies employed a cell membrane that is robust against  
81 physical perturbation and are thus incompatible with molecular tools, or did not accommodate  
82 for single filament visualization. Hence, there is little quantitative information on the relationship  
83 between spindle force and its architectural dynamics, and thus, the micromechanics of this  
84 heterogeneously arranged filament assembly remain mysterious.

85

86 Here, to fill this knowledge gap, we combined microneedle-based quantitative  
87 micromanipulation with fluorescence speckle microscopy to measure and perturb local spindle  
88 force and to simultaneously observe individual microtubule motility *in situ*. The use of *Xenopus*  
89 egg extract, which is widely used for studying many cell-cycle events including spindle assembly  
90 (Hannak and Heald, 2006), allowed us to perform controlled force perturbation as well as  
91 titration over labeled tubulins to achieve conditions necessary for single-filament tracking. We  
92 show how the heterogeneously arranged microtubule arrays respond to force and slide apart  
93 while maintaining overall stability, and its dependency on motor protein activities.

94

## 95 **Results**

### 96 *Establishing a method for probing local mechanical responses of microtubules in the* 97 *metaphase spindle*

98 We used force-calibrated microneedles (stiffness: 0.3–0.5 nN/ $\mu\text{m}$ ) to probe mechanical responses  
99 of microtubules that assemble the *Xenopus* metaphase spindle (Fig. 1A). The microneedles had  
100 sufficient bending flexibility and axial rigidity, enabling us to insert the probe tip into the dense  
101 microtubule arrays while applying calibrated local force along the pole-to-pole axis of the  
102 spindle, the direction along which microtubules roughly align and slide apart. The magnitude of

103 the force applied ranged from 0.4 nN to 1.1 nN, the amount typical for chromosome pulling and  
104 spindle positioning in a cell (Garzon-Coral et al., 2016; Zhang and Nicklas, 1999). Microtubule  
105 motion response was simultaneously observed using spinning-disk confocal microscope, by  
106 tracking the fluorescent ‘speckles’ from X-rhodamine-labeled tubulins (20 nM) incorporated into  
107 the filament lattices (probability: <0.4 per filament) (Yang et al., 2007) (Fig. 1B). Images were  
108 acquired at  $\sim 5 \mu\text{m}$  above the coverslip surface, a distance that allowed minimal surface friction  
109 but sufficient imaging sensitivity.

110

111 Under these conditions and in the absence of an external force, tubulin speckles exhibited  
112 persistent poleward translocation at  $\sim 2\text{--}3 \mu\text{m}/\text{min}$ , while exhibiting stochastic motion fluctuation  
113 along the filament’s long axis, in agreeing with previous reports (Yang et al., 2007) (Fig. 1C, D).  
114 To determine the mechanical responses of individual microtubules, we needed to eliminate this  
115 intrinsic motion ‘noise’. To this end, we developed a method based on oscillatory force input. As  
116 shown in Fig. 1E and F, the application of a sinusoidal force at an optimized frequency (0.1 Hz)  
117 resulted in periodic back-and-forth movements in the majority of tubulin speckles (>80% of  
118 total) without perturbing the overall flux dynamics. The amplitude of the induced speckle  
119 movement, which appeared predominantly along the spindle’s pole-to-pole axis (Fig. S1A), was  
120 determined based on a least-square fitting to a sinusoidal function (Fig. S1B) and then mapped  
121 onto a two-dimensional heat map (Fig. 1G). Projecting the heat map onto the long (Fig. 1H) and  
122 short (Fig. 1I) spindle axes revealed the extent of induced speckle movement and its spatial  
123 dependency. The speckles’ oscillatory responses did not decay over time (Fig. S1C), provided  
124 that our measurements were made while the steady-state metaphase structure was maintained.  
125 Further, as the flux dynamics persisted, the direction of the time-averaged speckle movement

126 could be used to define filament polarity. We thus established a method for analyzing local force  
127 responses of spindle microtubules depending on filament position and polarity.

128

129 ***Microtubule arrays at the middle of the spindle half are more mechanically compliant than***  
130 ***those near the pole and the equator***

131 Using this approach, we first asked whether the mechanical responses of microtubules differ  
132 depending on their position in the spindle (Fig. 2). The microneedle tip was inserted into either  
133 of three spindle regions: near the pole, near the equator, or at the middle of the spindle half.  
134 Speckle motion amplitude profiles (as in Fig. 1G) were obtained for multiple spindle samples,  
135 pooled, and averaged to generate an average motion amplitude profile along the long (Fig. 2A–  
136 C) and short (Fig. 2E–G) spindle axes. We found that for forces applied near the spindle pole ( $<5$   
137  $\mu\text{m}$  from the structure's edge), the profile showed a plateau phase over  $\pm 5 \mu\text{m}$  from the point of  
138 force application ( $<10\%$  drop), indicating a coupled lattice movement at the vicinity of the  
139 spindle pole (Fig. 2A). This concerted lattice movement was also observed when force was  
140 applied near the spindle equator ( $<5 \mu\text{m}$  from the structure's center), albeit that the amplitude  
141 was maintained toward both spindle poles (Fig. 2C). Notably, however, when force was applied  
142 at the middle of the spindle half (i.e. between the pole and the equatorial regions), we observed  
143 much steeper amplitude decay ( $>50\%$  drop) within the same  $\pm 5\text{-}\mu\text{m}$  distance (Fig. 2B).  
144 Normalized motion amplitude profiles further revealed that the induced relative lattice  
145 movement was  $>2$ -fold larger at the middle of the spindle half (slope:  $0.13 \pm 0.05$ ) than near the  
146 pole ( $0.03 \pm 0.02$ ) and the equator ( $0.06 \pm 0.05$ ) ( $n = 5$  each, Fig. 2D). Speckles located along the  
147 short spindle axis also exhibited substantial movement parallel to the direction of force  
148 application (Fig. 2E–H), indicating lateral mechanical coupling between neighboring filaments.

149 Therefore, the arrays of microtubules are mechanically coupled in both longitudinal and lateral  
150 directions, and the coupling strength varies depending on spindle location.

151

152 Based on the extent of local lattice movement and the amount of force applied, we estimated the  
153 dynamic modulus of the spindle, a measure of the structure's stiffness (see Materials and  
154 Methods). The moduli for the long axis were  $5.6 \pm 2.0$ ,  $1.4 \pm 0.2$ , and  $3.2 \pm 1.4$  kPa (or  $\times 10^3$   
155  $\text{pN}/\mu\text{m}^2$ ) at the pole, the middle of the spindle half, and the equator, respectively (magenta, Fig.  
156 2I) ( $n = 5$ ). On the other hand, the moduli for the short axis were much smaller overall, but also  
157 depended on spindle location:  $0.7 \pm 0.3$ ,  $0.3 \pm 0.1$ , and  $0.4 \pm 0.2$  kPa, in the same location order  
158 (cyan, Fig. 2I). The values are in an order of magnitude comparable to previously measured  
159 macroscopic spindle stiffness (several kPa) (Itabashi et al., 2009; Takagi et al., 2014) and  
160 indicate the substantial local mechanical compliance of filament arrays at the middle of the  
161 spindle half.

162

163 Our previous study showed that the spindle is a viscoelastic material (Shimamoto et al., 2011),  
164 and thus, the local mechanical responses may vary depending on the timescale at which forces  
165 are applied. As our method allowed for analyzing speckle motion at relatively slow timescales  
166 (e.g. 0.1 Hz), we conducted an independent stiffness measurement based on microrheology  
167 analysis (Fig. S2A–D). The analysis revealed greater mechanical compliance at the middle of the  
168 spindle half than near the pole and the equator, over a range of timescales from minutes to sub-  
169 seconds (frequency: 0.02–4 Hz) (Fig. 2J). Moreover, the structure underwent a predominantly  
170 viscous, fluid-like deformation at the middle of the spindle half, whereas the structure close to  
171 the spindle pole exhibited less fluidity (Fig. 2K). Together, microtubule arrays at the middle of



172 the spindle half engage in a relatively weak, viscous mechanical coupling, whereas those around  
173 the spindle pole are more rigid and elastic.

174

175 ***Spindle microtubule response to force is independent of filament polarity***

176 Microtubules in the spindle orient toward either the left or the right spindle pole, and the  
177 proportion varies depending on their location in the spindle. To test whether this filament feature  
178 leads to different mechanical outputs, we analyzed the dependency of the speckles' force  
179 responses on filament polarity (Fig. 3). Tubulin speckles were classified into two groups based  
180 on the directionality of their persistent poleward movements, and then the force-induced motion  
181 amplitude was determined as described above (Fig. 3A). Consistent with previous studies, the  
182 two motile fractions appeared nearly equal at the equator (~50:50), while those moving toward  
183 the proximal spindle pole became predominant nearer the pole (~80:20), suggesting the  
184 predominance of parallel filaments with their minus-ends facing outward (n = 4, Fig. 3B).  
185 However, we found no significant differences in speckle motion amplitude depending on the  
186 assigned filament polarity, within the accuracy that could resolve its regional variation (Fig. 3C).  
187 The analysis was conducted for multiple spindle samples (n = 4), with consistent results (Fig.  
188 3D). These findings suggest that at each spindle location, microtubules engage in approximately  
189 equal mechanical coupling regardless of filament orientation. In addition, the compliant filament  
190 array at the middle of the spindle half is predominantly parallel.

191

192 ***Microtubule arrays nearer the spindle pole predominantly slide outward against pole-***  
193 ***separating force while the dynamics of equatorial filaments are maintained***

194 The local microtubule responses we characterized thus far occurred at sub-micron length scale,  
195 while spindles maintained a steady pole-to-pole length. To examine how the filaments respond to  
196 force that influences macroscopic spindle-length, we employed a dual-microneedle setup (Takagi  
197 et al., 2014) and induced a global length perturbation of the spindle (~20% increase from the  
198 steady-state size) (Fig. 4A). Spindles were double-labeled with Alexa 488-tubulin (400 nM) and  
199 X-rhodamine-tubulin (20 nM) for imaging their overall morphology and individual microtubule  
200 motion dynamics, respectively, and were stretched by moving one microneedle away from the  
201 other (Fig. 4B). The stretching speed (100 nm/s) was such that it led to the development of nN-  
202 order force across the length of the bipolar structure (Takagi et al., 2014). The analysis was  
203 conducted for speckles that could be tracked for >10 s, a period that covers average tubulin  
204 turnover in spindles (~30–60 s) (Needleman et al., 2010; Salmon et al., 1984). As shown in the  
205 kymograph (Fig. 4C), soon after the microneedle movement was initiated ( $t = 0$ ), the spindle first  
206 underwent a brief period of parallel translocation due to mechanical compliance between the  
207 probe tip and the spindle (labeled “Trans” in Fig. 4C), and then continuously elongated until the  
208 microneedle motion was stopped (labeled “Stretch” in Fig. 4C). Quantitative analysis revealed  
209 that during the course of the stretch, spindle length increased at a nearly constant velocity ( $96 \pm$   
210  $26$  nm/s,  $n = 4$ ) and reached ~110–130% of the initial pole-to-pole distance ( $34.2 \pm 6.0$   $\mu\text{m}$  to  
211  $40.7 \pm 6.2$   $\mu\text{m}$ ,  $n = 4$ ) (orange highlighted area in Fig. 4D). Associated with this change, tubulin  
212 speckles moved predominantly parallel to the force application direction and yielded trajectories  
213 of various contour lengths (Fig. 4E). Average instantaneous velocities of the speckles were  
214 calculated along individual trajectories and then corrected for velocities relative to the spindle  
215 center to compensate overall bias toward the moving spindle pole.

216

217 In the absence of an external force, we observed that the speckles exhibited a non-uniform  
218 velocity distribution along the long spindle axis (Fig. 4F, G), consistent with previous reports  
219 (Burbank et al., 2007; Yang et al., 2008). The average absolute velocity was  $2.4 \pm 1.3 \mu\text{m}/\text{min}$   
220 around the equator ( $n = 135$  tracks; blue highlighted area, Fig. 4G) and  $1.4 \pm 1.0 \mu\text{m}/\text{min}$  nearer  
221 the pole ( $n = 63$  tracks; white area, Fig. 4G). When the outward stretching force was applied (Fig.  
222 4H, I), the speed of speckle movement nearer the spindle pole increased to a level that nearly  
223 matched the rate of spindle elongation ( $2.3 \pm 1.4 \mu\text{m}/\text{min}$ ;  $n = 33$  tracks) (white area, Fig. 4I).  
224 Notably, however, this force did not significantly influence the dynamics of speckles located  
225 around the equator, where the bidirectional antiparallel movement was maintained at nearly the  
226 intrinsic velocity ( $2.4 \pm 1.2 \mu\text{m}/\text{min}$ ;  $n = 93$  tracks, blue highlighted area in Fig. 4I). During the  
227 course of the stretch, the overall distribution of speckle velocity maintained symmetry, indicating  
228 that the manipulation was applied evenly (histograms in Fig. 4G, I). We repeated the analysis for  
229 three additional spindles that had been successfully stretched, and consistently observed the  
230 preferential acceleration of speckle translocation nearer the pole versus the equator (Fig. S3A).  
231 The enhanced speckle motility was most likely caused by induced relative filament sliding, not  
232 breakage of the filaments, because a majority of speckles maintained steady translocation speed  
233 during the course of stretch (Fig. S3B). Further, the magnitude of the force applied ( $<1 \text{ kPa}$ ) was  
234 orders of magnitude lower than the tensile strength of microtubules ( $>1 \text{ MPa}$ ) (Peter and Mofrad,  
235 2012).

236

237 Fig. 4J summarizes the effect of an applied stretching force on the speed of speckle movement at  
238 various spindle locations. The profile should yield a straight line if the change in speckle  
239 movement is uniform across the spindle length (grey broken line in Fig. 4J; for schematic, see

240 Fig. 4K). On the other hand, the profile deviates from the linear relationship when predominant  
241 sliding occurs nearer the pole or the equator (solid and dotted lines, respectively, in Fig. 4J; Fig.  
242 S3C). Our data is more consistent with a concave shape, indicating that major filament sliding  
243 took place nearer the pole, including the middle of the spindle half (red plots in Fig. 4J). Together,  
244 the microtubule arrays nearer the spindle pole adapt to a force that perturbs the spindle's pole-to-  
245 pole distance, while the dynamics of equatorial filament arrays are largely unperturbed.

246

### 247 *Kinesin-5 contributes to the rigidity of microtubule arrays near the pole and the equator*

248 To explore the molecular mechanisms underlying the local microtubule responses, we  
249 molecularly perturbed the key spindle motors, kinesin-5 and dynein (Fig. 5). The single  
250 microneedle setup was used for these analyses as it enabled us to measure the mechanics of  
251 essentially any spindle phenotype, including spindles with fragile poles. Our primary focus was  
252 on kinesin-5, which localizes all along the spindle and is enriched near the pole (Sawin et al.,  
253 1992). We first used AMPPNP (1.5 mM), a slow-hydrolyzing ATP analogue that immobilizes  
254 kinesin-5 onto the microtubule lattice in the “rigor” state (Kapoor and Mitchison, 2001). Dynein  
255 is relatively insensitive to AMPPNP (Heald et al., 1996). This treatment did not significantly  
256 alter overall spindle length and bipolarity (Fig. 5A); however, we found a global reduction in  
257 mechanical responses of the microtubule arrays across the length of the bipolar structure (Fig.  
258 5B–D, Fig. S4A). The local dynamic modulus (stiffness) increased accordingly ( $11.7 \pm 2.7$ ,  $3.5 \pm$   
259  $1.6$ , and  $4.0 \pm 1.6$  kPa at the pole, middle, and equator;  $n = 3$  each), with statistical significance at  
260 the pole and the middle of the spindle half (Fig. 5E), suggesting that persistent cross-bridges  
261 were made between overlapping microtubules.

262

263 Next, we used monastrol, an inhibitor of kinesin-5. Monastrol reduces the affinity of kinesin-5  
264 for the microtubule lattice *in vitro* (Kwok et al., 2006). Although spindles collapsed at a high  
265 dose (e.g. 100  $\mu\text{M}$ ), bipolarity was maintained when using a relatively low dose (i.e. 10  $\mu\text{M}$ ), the  
266 efficacy of which was confirmed by the reduced flux velocity ( $1.0 \pm 0.1 \mu\text{m}/\text{min}$ ,  $n = 5$ ; versus  
267  $1.7 \pm 0.3 \mu\text{m}/\text{min}$  for control,  $n = 7$ ) (Fig. S4B, C). We found that upon this treatment, the  
268 speckle motion profile obtained nearer the spindle pole were similar or slightly suppressed as  
269 compared to control (orange in Fig. 5G, H). On the other hand, the profile exhibited a sharper  
270 amplitude peak for forces applied near the spindle equator, suggesting enhanced relative filament  
271 movement (orange in Fig. 5I). When we increased the monastrol dosage (i.e. 20  $\mu\text{M}$ ), spindles  
272 shortened to  $26.1 \pm 4.2 \mu\text{m}$  ( $n = 6$ ; versus  $37.4 \pm 4.8 \mu\text{m}$  for control) while still maintaining  
273 steady length and bipolarity (Fig. S4B, D). Although such small spindles could be analyzed only  
274 at two regions, the profiles became much sharper both at the pole and at the equator (red in Fig.  
275 5G, I; Fig. S4E). The estimated local dynamic moduli indicated that the equatorial filament  
276 arrays are sensitive to kinesin-5 inhibition, acquiring  $\sim 3$ -fold mechanical compliance upon  
277 monastrol treatment ( $1.4 \pm 0.8 \text{ kPa}$  at 10  $\mu\text{M}$ ;  $2.1 \pm 0.5 \text{ kPa}$  at 20  $\mu\text{M}$ ,  $n = 3$  each) (Fig. 5J). The  
278 filament array near the spindle pole was less sensitive to this inhibition, but also became  
279 compliant upon increasing the dosage ( $7.5 \pm 2.3 \text{ kPa}$  at 10  $\mu\text{M}$ ;  $3.3 \pm 1.4 \text{ kPa}$  at 20  $\mu\text{M}$ ;  $n = 3$  and  
280 5, respectively) (Fig. 5J). Together, these data suggest a broad localization of kinesin-5 across the  
281 bipolar structure, and that the activity is required for maintaining spindle length while achieving  
282 robust filament couplings near the pole and the equator.

283

284 *Dynein contributes to the coupling of microtubule arrays away from the equator*

285 We next focused on dynein, a minus-end directed microtubule motor whose well-characterized  
286 function is spindle pole organization (Compton, 1998). An addition of the monoclonal antibody  
287 to the dynein light chain (Gaglio et al., 1997) resulted in a barrel-like microtubule array with  
288 sprayed poles, the common phenotype of dynein inhibition (Fig. 5K). Because of the unfocused  
289 pole, the spindle regions were defined based on the distance solely from the equator such that it  
290 nearly matches the region classification of unperturbed spindles (white dotted lines, Fig. 5K).  
291 Upon dynein inhibition, we found a noticeable sharpening of the motion amplitude profile at >15  
292  $\mu\text{m}$  away from the equator (Fig. 5L and S4F), consistent with sparse microtubule arrays seen in  
293 fluorescence images. Importantly, the difference was also observed at 5-15  $\mu\text{m}$  regions from the  
294 equator (Fig. 5M), but was not prominent nearer the equator (<5  $\mu\text{m}$  region) (Fig. 5N). The local  
295 stiffness moduli estimated were  $1.2 \pm 1.5$ ,  $0.8 \pm 0.3$ , and  $2.6 \pm 1.0$  kPa ( $n = 4$  each) for regions <5  
296  $\mu\text{m}$ , 5–15  $\mu\text{m}$ , and >15  $\mu\text{m}$  from the equator, among which  $\geq 5$   $\mu\text{m}$  regions yielded statistically  
297 significant weakening of the structure as compared to control (Fig. 5O). These suggest that  
298 dynein contributes to the mechanical coupling of microtubule arrays all along the spindle, except  
299 for those around the equator.

300

## 301 **Discussion**

302 Our microneedle-based quantitative micromanipulation with high-resolution fluorescence  
303 imaging enabled for directly probing the dynamic changes in position and motility of  
304 microtubules in the spindle that respond to applied forces. We found that microtubules at the  
305 middle of the spindle half engage in less rigid, more fluid-like mechanical coupling with  
306 neighboring filaments and exhibit larger relative movement against perturbing forces, as  
307 compared to those around the spindle pole and the equator. Consistent herewith, we discovered

308 that microtubule lattices nearer the spindle pole are extensively slid apart from the equator in  
309 response to force altering the pole-to-pole distance, while the arrays of equatorial antiparallel  
310 filaments were maintained. From these findings, we propose a model of spindle micromechanics,  
311 which is determined by mechanically robust microtubule arrays at the pole and the equator, and  
312 more loosely coupled filament arrays at the middle of the spindle half (Fig. 6A).

313

314 Currently, the most advanced models of metazoan spindles describe a steady-state spindle  
315 architecture assembled from the collection of short microtubule filaments (Brugues et al., 2012;  
316 Burbank et al., 2007; Yang et al., 2008; Yang et al., 2007); however, none explicitly explains the  
317 physical nature of the filament interactions and how forces influence their arrangement and  
318 motility. . By mechanically perturbing the spindle, we found that there is a predominant fraction  
319 of equatorial microtubules whose mechanical coupling to the spindle pole is considerably weak,  
320 and thus, their dynamics is insensitive to a force that pulls the two poles apart. On the other hand,  
321 microtubule arrays nearer the spindle pole engage in more rigid mechanical connection and their  
322 movement is tightly coupled to spindle-length change. Given the shortness of the filaments, the  
323 microtubule array at the middle of each spindle half is likely formed by overlapping ends of  
324 equatorial antiparallel filaments and polar parallel filaments (blue highlighted area in Fig. 6A).  
325 Our data show that this predominantly parallel filaments array has less mechanical resistance  
326 than other spindle location and can adapt to force that alters the pole-to-pole distance. Further,  
327 microtubules growing from the opposite spindle pole engage in nearly equivalent mechanical  
328 coupling with neighboring filaments, masking their structural polarity. These filament-coupling  
329 features, which are relatively weak, spatially heterogeneous, and polarity-independent, enable the  
330 spindle to transmit and respond to force in a manner that is distinct from the long-standing model

331 of spindle assembly, in which the arrays of equatorial antiparallel microtubules connect two  
332 spindle poles and balance the pole-to-pole distance (Inoue and Salmon, 1995; Mitchison and  
333 Salmon, 2001; Scholey et al., 2003).

334

335 Our results also suggest how the robust and adaptable nature of the microtubule arrays emerges  
336 from motor protein mechanics. At the spindle equator, the major protein that maintains the  
337 filament dynamics is likely kinesin-5, as our data showed the sensitivity of the equatorial  
338 mechanics to chemical inhibitor. When kinesin-5 was inhibited, filament sliding slowed down,  
339 most likely because of a lower number of force generators acting against a constant load, and  
340 further, the filaments more easily slid apart against the force perturbing their motility. Unlike  
341 other kinesins, such as vesicle transporting kinesin-1, *Xenopus* kinesin-5 can maintain a stable  
342 association with the lattices of microtubules and generate substantial braking force against fast  
343 filament sliding (Shimamoto et al., 2015; Valentine et al., 2006). This resistive motor force is  
344 additive (Shimamoto et al., 2015) and can thus accumulate across the filament overlap of several  
345 microns at which many kinesin-5 molecules localize (Kashina et al., 1996). Because of these  
346 motor properties, each kinesin-5 molecule should experience only a subtle force fluctuation that  
347 is insufficient to perturb the intrinsic enzymatic cycle, thus maintaining the speed of antiparallel  
348 filament sliding and preventing excess filament translocation against perturbing forces (“Equator”  
349 in Fig. 6B). Our inhibition assays suggested that, around the spindle pole, kinesin-5 also  
350 crosslinks parallel microtubules and enhances filament coupling, as predicted from its substantial  
351 pole localization (Sawin et al., 1992) and reconstitution assays (Kapitein et al., 2005; Shimamoto  
352 et al., 2015). Filament coupling at the pole also depended on dynein, in agreement with previous  
353 studies (Gaglio et al., 1997; Tan et al., 2018). Thus, kinesin-5 and dynein may act together to



354 make the rigid filament coupling when microtubules reach the pole (“Pole” in Fig. 6B). In  
355 contrast to these robust structures, however, those at the middle of the spindle half appeared  
356 much more compliant. Our findings suggest that within this filament array where predominant  
357 microtubules run in parallel, kinesin-5 crosslinking activity is largely suppressed (“Middle” in  
358 Fig. 6B). On the other hand, dynein plays a prominent role, likely via its minus-end  
359 accumulation and lateral interaction with adjacent filaments (Hueschen et al., 2017; Tan et al.,  
360 2018) (“Middle” in Fig. 6B). Based on our measurement of local spindle stiffness ( $\sim 1,000$   
361  $\text{pN}/\mu\text{m}^2$ ) and the density of microtubules ( $\sim 100/\mu\text{m}^2$ ), the linkage could generate  $\sim 10$  pN force  
362 per filament, an amount 2- to 5-fold larger than the stall force of single dynein molecules  
363 walking along a single microtubule (Gennerich et al., 2007; McKenney et al., 2010; Torisawa et  
364 al., 2014). The parallel filament interaction could also be mediated by non-motor microtubule-  
365 associated proteins such as the augmin complex, which caps the filament minus-ends and  
366 promotes microtubule branching (Goshima et al., 2008). This might be the basis of the  
367 mechanical resistance that was observed upon dynein inhibition. The viscous, fluid-like property  
368 identified nearer the equator reflects the dynamicity of crosslinkers that allows for filament re-  
369 arrangements, whereas the elastic property nearer the pole suggests static, persistent cross-  
370 bridges. Our work thus predicts a rich micromechanics underlying parallel microtubules, which  
371 is less appreciated but as important as that in antiparallel filaments.

372

373 In the spindle, chromosomes are captured by another subset of parallel microtubules, called  
374 kinetochore microtubules or k-fibers, which run across the spindle half and pull the chromatids  
375 toward the poles. Although this filament fraction was minor in our present study ( $<10\%$  of total  
376 filament number), their length must also be coupled to spindle length in order to prevent

377 chromosomes from detaching. A recent electron tomography study revealed that kinetochore  
378 microtubules of *C. elegans* spindles are not continuous, but rather, their minus-ends are  
379 terminated midway and embedded within a network of short microtubules assembled around the  
380 pole (Redemann et al., 2017). In addition to the previously identified mechanism regulating  
381 filament depolymerization at the fiber ends (Dumont and Mitchison, 2009a; Skibbens and  
382 Salmon, 1997), we predict that the mechanical linkage between the filaments is compliant and  
383 can adapt to force. Capturing the motility of individual microtubules within this thick filament  
384 bundle would be an important next challenge to build a complete model of spindle  
385 micromechanics.

386

387 Our findings on spindle's mechanical heterogeneity suggest functional advantages as it allows  
388 for maintaining the equatorial spindle dynamics while controlling the pole-to-pole distance. The  
389 equatorial microtubule arrays serve as structural scaffolds for physical stretching of kinetochores  
390 (Elting et al., 2017) and for biochemical signaling of cytokinetic furrow positioning (Oegema  
391 and Mitchison, 1997). We anticipate that the mechanically distinct local microtubule arrays  
392 maintain these spindle functions, ensuring the robustness of chromosome segregation while  
393 adapting to perturbation for error-free cell division.

## 394 **Materials and Methods**

### 395 *Spindle assembly*

396 Metaphase spindles were assembled in extracts prepared from unfertilized *X. laevis* eggs  
397 according to a well-established method (Desai et al., 1999). Freshly prepared, cytostatic factor-  
398 arrested extracts (30  $\mu$ l per reaction) were first supplemented with demembrated *X. laevis*  
399 sperm nuclei (400 nuclei/ $\mu$ l) and released into interphase by addition of  $\text{Ca}^{2+}$  at a final  
400 concentration of 0.4 mM. Following 90-min incubation at 18°C, reactions were diluted with the  
401 equal volume of fresh extracts and cycled back into metaphase. Following 50-min incubation, X-  
402 rhodamine-labeled tubulin and Alexa 488-labelled tubulin, prepared according to a previously  
403 described method (Hyman et al., 1991), were added to extracts at a final concentration of 20 nM  
404 and 800 nM, respectively. SYTOX Green (S7020, Invitrogen) was also added to extracts at a  
405 final concentration of 250 nM for chromosome imaging. Experiments were performed 60–150  
406 min from the start of spindle assembly, during which no noticeable changes in spindle mechanics  
407 and overall morphology were observed.

408

### 409 *Microneedles*

410 Microneedles were prepared by pulling glass rods (G1000, Narishige) using a capillary puller  
411 (PC-10, Narishige) followed by processing of their tips using a microforge (MF-100, World  
412 Precision Instruments) (Shimamoto and Kapoor, 2012). For precise control over its position and  
413 movement in viscous egg extracts while probing spindle force with sufficient sensitivity, the tip  
414 of each force-calibrated microneedle was made  $\sim$ 1–2  $\mu$ m in diameter and  $\sim$ 100–300  $\mu$ m in length,  
415 which yielded a stiffness of 0.3–0.5 nN/ $\mu$ m as determined by the cross-calibration method  
416 (Shimamoto and Kapoor, 2012). The tips of microneedles used in spindle-stretching experiments

417 were made >100-times stiffer, with ~2- $\mu$ m diameter and ~50- $\mu$ m length.

418

### 419 *Microscopy*

420 Spindle micromanipulation was carried out in an inverted light microscope (Ti-E, Nikon)  
421 equipped with a pair of three-axis hydraulic micromanipulators (MHW-3, Narishige), a 100 $\times$   
422 objective (Apo TIRF, 1.49NA, Nikon), an objective scanner (PIFOC, Physik Instrumente), a  
423 motorized sample stage (MS-2000, Applied Scientific Instruments), a spinning-disk confocal unit  
424 (CSU-X1, Yokogawa), and an sCMOS camera (Neo 4.0, Andor). Two excitation lasers (488 nm  
425 and 561 nm, 40 mW, OBSI, Coherent) were merged using an in house-built laser combiner and  
426 were introduced into the confocal unit via an optical fiber (Yokogawa). The microscope and  
427 imaging instruments were wired to a computer and controlled using image acquisition software  
428 (NIS-Elements, ver. 4.50, Nikon).

429

430 For oscillatory perturbation experiments, a single-microneedle setup was used. First, 4  $\mu$ L of a  
431 cycling extract containing pre-assembled spindles was placed in an open experimental chamber,  
432 which was assembled from a coverslip (Matsunami) and a rubber plate with 10-mm central  
433 aperture, and covered with mineral oil (M-5310, Sigma). Under a confocal microscope, a bipolar  
434 spindle of typical size and shape was selected under low illumination conditions, and the tip of a  
435 force-calibrated microneedle was inserted into the region of interest within the spindle. The  
436 microneedle tip was brought down to 1–2  $\mu$ m above the coverslip while maintaining nearly  
437 vertical approaching angle (>80 $^\circ$  with respect to the horizontal plane). The microneedle base was  
438 held by a translational piezo actuator (P-841.20, Physik Instrumente) whose displacement was  
439 controlled by a voltage signal generated in an in house-written LabView program (National

440 Instruments) and sent via a closed-loop piezo driver (E-665, Physik Instrumente). Experiments  
441 were performed using a sinusoidal force (frequency: 0.1 Hz) applied by moving the microneedle  
442 tip parallel to the spindle pole-to-pole axis. The amount of force applied was estimated based on  
443 the displacement of the microneedle tip from its equilibrium position, which was determined  
444 using time-lapse imaging of the tip and piezo sensor reading. Time-lapse images were acquired  
445 at a single confocal plane (~5  $\mu\text{m}$  from the coverslip surface) with pre-optimized image  
446 acquisition settings (interval: 1 s; exposure time: 200 ms for 488 nm and 500 ms for 561 nm) that  
447 fulfilled the following requirements: 1) photo-damage and photobleaching were minimal, and 2)  
448 individual tubulin speckles could be tracked across the time-lapse sequence.

449

450 For microrheology analysis, a piezo-based nano-positioning stage (Nano-LP200, Mad City Lab)  
451 was mounted onto the motorized sample stage and moved in a sinusoidal manner at a fixed  
452 frequency (0.02–4 Hz) and amplitude (0.7–1.0  $\mu\text{m}$ ) along the pole-to-pole axis of the spindle.  
453 The base of the force-calibrated microneedle was held at a fixed position throughout the  
454 measurement while its tip was inserted into the spindle. Bright-field images were acquired at the  
455 sampling rate 50-times the frequency of the oscillatory force input for measurements at  $\leq 0.2$  Hz  
456 (e.g. 1,000 ms interval for 0.02 Hz input), and at a fixed 40-ms interval for measurements at  $> 0.2$   
457 Hz. The magnitude of applied force was monitored based on the microneedle tip's displacement.  
458 The amount of spindle deformation was estimated by the relative displacement of the  
459 microneedle tip and the spindle, whose position change was monitored by tracking the center of  
460 a tracer microbead (LB30, Sigma) immobilized onto the coverslip surface.

461

462 For stretching perturbation experiments, the microscope setup as described above was used, but

463 with a dual-microneedle setup (Takagi et al., 2014). In each experiment, a single bipolar spindle  
464 of typical size and shape was captured by inserting the tips of the microneedles near the opposite  
465 spindle poles ( $<5 \mu\text{m}$  from the structure's edge). One microneedle was used to pin down the  
466 spindle while the other microneedle was used to stretch the bipolar structure at a constant  
467 velocity (100 nm/s). The stretching motion of the microneedle was controlled by either manual  
468 steering of the micromanipulator or using the piezo actuator attached to the microneedle base.  
469 Time-lapse images were acquired in a single confocal plane at 3-s intervals while switching two  
470 excitation lasers with  $<200$  ms time delay (exposure time: 400 ms for 488 nm and 300 ms for  
471 561 nm). Spindles displaying no visible elongation in response to the micromanipulation ( $<10\%$   
472 of the original steady-state length) usually associated with pole disorganization and were  
473 excluded from subsequent analyses.

474

#### 475 ***Molecular perturbation***

476 AMPPNP (Sigma) was used at a final concentration of 1.5 mM after adjustment of the pH to  
477  $\sim 7.7$  with potassium hydroxide. Monastrol (M8515, Sigma) was used at a final concentration of  
478 10 or 20  $\mu\text{M}$  in the presence of 0.5% DMSO. Monoclonal antibody to the dynein light chain  
479 (D5167, Sigma) was first dialyzed against a buffer comprised of 50 mM potassium glutamate  
480 and 0.5 mM  $\text{MgCl}_2$  using a centrifugal membrane filter (Amicon Ultra, Millipore) and then  
481 added to extracts at a final concentration of 1 mg/ml (Heald et al., 1997). Reagents were  
482 prepared as 50–100 $\times$  working stocks in CSF-XB (10 mM K-Hepes, pH 7.7, 1 mM  $\text{Mg}^{2+}$ , 1 mM  
483 EGTA, 150 mM KCl, 50 mM sucrose) and were added to extracts containing pre-assembled  
484 spindles.

485

486 ***Data analysis***

487 Spindle length was measured on the basis of fluorescence images of Alexa 488-tubulin. In each  
488 image of a time-lapse sequence, a line-scan was performed along the pole-to-pole axis of the  
489 spindle. The edges of the line-scan profile were detected on the basis of an intensity threshold  
490 that was set at 25% of the maximal spindle signal intensity. The distance between the two edge  
491 positions was defined as the spindle length.

492

493 Speckle motion was analyzed on the basis of fluorescence images of X-rhodamine-tubulin. The  
494 entire time-lapse image stack from each experiment was first low-pass filtered (pixel width:  $2 \times$   
495 2) in the NIS-Elements software and then loaded in the Particle Track and Analysis plugin  
496 (<https://github.com/arayoshipta/PTA2>) in ImageJ. Speckles were detected on the basis of the total  
497 intensity and size of fluorescence spots that exceeded fixed threshold values, and then, their  
498 intensity profiles were each fit to a two-dimensional Gaussian function for calculating the  
499 centroid position. The speckles that were detected in each image were then linked across the  
500 time-lapse sequence, with fixed linking parameters. After visual inspection of representative  
501 speckle trajectories, the motion of each speckle was analyzed as follows:

502

503 *1) Oscillatory perturbation experiments.* The time recording of each speckle displacement  
504 along the long spindle axis ( $x_L$ ) was fit to a sinusoidal function, which was given by  $x_L(t) = A$   
505  $\sin(\omega t + \theta) + Bt + C$ . Here,  $A$  is the amplitude of speckle motion,  $\omega$  is the angular frequency  
506 corresponding to the input force sinusoid (0.1 Hz,  $\omega \sim 0.63$  rad/s),  $\theta$  is the oscillatory phase,  
507 and  $t$  is the time elapsed from the onset of force application. The variable  $B$  is to compensate  
508 translational movements of speckles associated with the poleward flux; a plus or minus sign

509 was used to assign the polarity of each microtubule filament. The variable  $C$  is to correct  
510 initial position offset. Fitting was conducted in Origin 2016 (Origin Lab) and data that yielded  
511 an  $R^2$  value above 0.25 were used for subsequent analyses. The profile of speckle motion  
512 amplitude along the long and short spindle axes was generated on the basis of data of speckles  
513 whose initial tracking point was included within a ROI. The ROI was drawn along each  
514 spindle axis (width:  $\pm 2.5 \mu\text{m}$ ). After the removal of outliers (defined as speckles exceeding  
515 the peak amplitude of the speckle closest to the force application point) followed by  
516 smoothing of the data plots (using 5- $\mu\text{m}$  moving average filter) and offset correction  
517 (subtracting the translational drift of the entire structure,  $\sim 0.1 \mu\text{m}$  typical), each profile was  
518 aligned at the local maximum within a  $\pm 5\text{-}\mu\text{m}$  region from the initial microneedle position,  
519 and profiles were averaged over multiple spindle samples.

520  
521 2) *Spindle stretching experiments.* For individual speckle trajectories acquired during the  
522 steady lengthening phase (see the Results section), the instantaneous velocity of the speckle  
523 was calculated by dividing the contour length of each trajectory by the period over which the  
524 speckle was tracked. Speckles that could be tracked over  $\geq 10 \text{ s}$  ( $\geq 3$  successive time-lapse  
525 frames) were used for subsequent analyses. The velocity data were plotted in a single imaging  
526 plane based on the position relative to the spindle equator, which was calculated using the  
527 initial tracking point of each speckle and the length and width of the spindle at the  
528 corresponding time point.

529  
530 The magnitude of the force ( $F$ ) applied was estimated on the basis of the pre-calibrated  
531 microneedle tip stiffness ( $k_M$ ) and its displacement from the equilibrium position ( $\Delta x_M$ ) according



532 to Hooke's law, which is given by  $F = k_M \Delta x_M$ .

533

534 For microrheology analysis, time-dependent changes of the force and spindle deformation were  
535 each fit to a sinusoidal function, which was given by  $A(t) = A_0 \sin(\omega t + \theta)$ , and used to  
536 determine the amplitude and phase. The effective stiffness was determined by the ratio of the  
537 force to the deformation amplitude. The phase shift was determined by the difference between  
538 the two oscillatory phases.

539

540 Local spindle region (i.e. pole, equator, and middle) was classified on the basis of the distance  
541 from either the structure's center or its outer edge, measured along the pole-to-pole axis of the  
542 spindle. The pole region was defined as the area within 5  $\mu\text{m}$  from the structure's outer edge. The  
543 equator region was defined as the area within 5  $\mu\text{m}$  from the structure's center. The middle  
544 region was defined as the area between the two above regions. Based on these definitions,  
545 reduced-sized spindles at 20  $\mu\text{M}$  monastrol allowed for data acquisition at only the equatorial  
546 and pole regions. For spindles with dynein inhibition, the regions were defined solely on the  
547 basis of the distance from the structure's center ( $<5 \mu\text{m}$ ,  $5\text{--}15 \mu\text{m}$ , and  $>15 \mu\text{m}$ ) because of  
548 defocused spindle poles.

549

550 The dynamic modulus of the spindle was estimated as follows. First, we measured local  
551 deformation of microtubule arrays that developed within a  $5 \times 5\text{-}\mu\text{m}$  area around the point of  
552 force application, analyzed on the basis of relative speckle movement in the  $x$ - $y$  plane (i.e. the  
553 imaging plane;  $x$ , long spindle axis;  $y$ , short spindle axis) and assuming that the deformation was  
554 even across the  $z$ -axis (i.e. over the entire spindle width). Below, we use the following indices for

555 each coordinate:  $x = 3$ ,  $y = 1$ , and  $z = 2$ . The local deformation was described by strain tensor  $E_{ij}$ ,  
556 where  $i$  and  $j$  are the directions of strain and normal plane, respectively. On the other hand, the  
557 stress developed within the area was described by stress tensor  $P_{ij}$ , where indices are identical to  
558 those of the strain tensor. These two tensors can be related by the dynamic modulus tensor  $C_{ijkl}$ ,  
559 as  $P_{ij} = C_{ijkl} E_{kl}$ . Here,  $P_{ij}$  is the symmetric tensor and thus,  $P_{12} = P_{21}$ ,  $P_{13} = P_{31}$ , and  $P_{32} = P_{23}$ , and  
560 similarly for  $E_{kl}$ . Also,  $C_{ijkl} = C_{jikl} = C_{ijlk} = C_{klij}$ . We also considered transverse isotropy of the  
561 bipolar spindle, where the y-z plane is the isotropic plane, and thus,  $C_{55} = C_{44}$  and  $C_{22} = C_{11}$  as  
562 Voigt index. Under these assumptions, the longitudinal stress  $P_{33}$  can be described as:  $P_{33} = C_{13}$   
563  $E_{11} + C_{13} E_{22} + C_{33} E_{33}$ . The transverse normal strain we measured experimentally was negligibly  
564 small and therefore,  $E_{11}$  and  $E_{22}$  were omitted. The longitudinal strain  $E_{33}$  was estimated by the  
565 difference in displacements at the peak and edge positions (averaged over values at the two  
566 edges) within the defined  $5 \times 5$ - $\mu\text{m}$  area. On the other hand, the longitudinal stress  $P_{33}$  was  
567 defined as the magnitude of force measured by the microneedle probe and the area normal to the  
568 force application vector. The lateral dynamic modulus was estimated under the same assumptions  
569 and was given by  $P_{31} = P_{32} = C_{44} E_{31}$ .

570

571 The statistical tests were performed in Origin Pro 9 (Origin Lab Corp) on the basis of two-tailed  
572 Student's  $t$ -test.

573 **Supplementary information**

574 Supporting data of this manuscript are provided as a separate PDF file. The PDF file includes  
575 Supplementary Figures 1–4, and captions of the figures.

576

577 **Acknowledgements**

578 We thank Dr. Akatsuki Kimura, Dr. Tarun Kapoor, and Dr. Shin'ichi Ishiwata for critical reading  
579 of the manuscript, and members of Shimamoto Lab for valuable comments and suggestions. This  
580 work was supported by JSPS KAKENHI 16H06166, 17K19362 (to Y.S) and JSPS Postdoctoral  
581 Fellowship (to J.T.).

582

583 **Author contributions**

584 J.T. and Y.S. designed assays, performed experiments, analyzed data, discussed results, and  
585 wrote the manuscript.

586

587 **Competing interest statement**

588 The authors declare no competing financial interests.

589 **References**

- 590 Brugues, J., Nuzzo, V., Mazur, E., and Needleman, D.J. (2012). Nucleation and transport  
591 organize microtubules in metaphase spindles. *Cell* *149*, 554-564.
- 592 Burbank, K.S., Groen, A.C., Perlman, Z.E., Fisher, D.S., and Mitchison, T.J. (2006). A new  
593 method reveals microtubule minus ends throughout the meiotic spindle. *J Cell Biol* *175*, 369-375.
- 594 Burbank, K.S., Mitchison, T.J., and Fisher, D.S. (2007). Slide-and-cluster models for spindle  
595 assembly. *Curr Biol* *17*, 1373-1383.
- 596 Compton, D.A. (1998). Focusing on spindle poles. *J Cell Sci* *111* ( Pt 11), 1477-1481.
- 597 Desai, A., Murray, A., Mitchison, T.J., and Walczak, C.E. (1999). The use of *Xenopus* egg  
598 extracts to study mitotic spindle assembly and function in vitro. *Methods Cell Biol* *61*, 385-412.
- 599 Dumont, S., and Mitchison, T.J. (2009a). Compression regulates mitotic spindle length by a  
600 mechanochemical switch at the poles. *Curr Biol* *19*, 1086-1095.
- 601 Dumont, S., and Mitchison, T.J. (2009b). Force and length in the mitotic spindle. *Curr Biol* *19*,  
602 R749-761.
- 603 Elting, M.W., Prakash, M., Udy, D.B., and Dumont, S. (2017). Mapping Load-Bearing in the  
604 Mammalian Spindle Reveals Local Kinetochore Fiber Anchorage that Provides Mechanical  
605 Isolation and Redundancy. *Curr Biol* *27*, 2112-2122.e2115.
- 606 Gaglio, T., Dionne, M.A., and Compton, D.A. (1997). Mitotic spindle poles are organized by  
607 structural and motor proteins in addition to centrosomes. *J Cell Biol* *138*, 1055-1066.
- 608 Ganem, N.J., and Compton, D.A. (2006). Functional roles of poleward microtubule flux during  
609 mitosis. *Cell Cycle* *5*, 481-485.
- 610 Garzon-Coral, C., Fantana, H.A., and Howard, J. (2016). A force-generating machinery  
611 maintains the spindle at the cell center during mitosis. *Science* *352*, 1124-1127.
- 612 Gennerich, A., Carter, A.P., Reck-Peterson, S.L., and Vale, R.D. (2007). Force-induced  
613 bidirectional stepping of cytoplasmic dynein. *Cell* *131*, 952-965.
- 614 Gordon, D.J., Resio, B., and Pellman, D. (2012). Causes and consequences of aneuploidy in  
615 cancer. *Nat Rev Genet* *13*, 189-203.
- 616 Goshima, G., Mayer, M., Zhang, N., Stuurman, N., and Vale, R.D. (2008). Augmin: a protein  
617 complex required for centrosome-independent microtubule generation within the spindle. *J Cell*  
618 *Biol* *181*, 421-429.
- 619 Hannak, E., and Heald, R. (2006). Investigating mitotic spindle assembly and function in vitro  
620 using *Xenopus laevis* egg extracts. *Nat Protoc* *1*, 2305-2314.
- 621 Hassold, T., and Hunt, P. (2001). To err (meiotically) is human: the genesis of human aneuploidy.  
622 *Nat Rev Genet* *2*, 280-291.
- 623 Heald, R., Tournebize, R., Blank, T., Sandaltzopoulos, R., Becker, P., Hyman, A., and Karsenti, E.  
624 (1996). Self-organization of microtubules into bipolar spindles around artificial chromosomes in  
625 *Xenopus* egg extracts. *Nature* *382*, 420-425.
- 626 Hiramoto, Y., and Nakano, Y. (1988). Micromanipulation studies of the mitotic apparatus in sand  
627 dollar eggs. *Cell Motil Cytoskeleton* *10*, 172-184.

- 628 Hueschen, C.L., Kenny, S.J., Xu, K., and Dumont, S. (2017). NuMA recruits dynein activity to  
629 microtubule minus-ends at mitosis. *Elife* 6.
- 630 Hyman, A., Drechsel, D., Kellogg, D., Salser, S., Sawin, K., Steffen, P., Wordeman, L., and  
631 Mitchison, T. (1991). Preparation of modified tubulins. *Methods Enzymol* 196, 478-485.
- 632 Inoue, S., and Salmon, E.D. (1995). Force generation by microtubule assembly/disassembly in  
633 mitosis and related movements. *Mol Biol Cell* 6, 1619-1640.
- 634 Itabashi, T., Takagi, J., Shimamoto, Y., Onoe, H., Kuwana, K., Shimoyama, I., Gaetz, J., Kapoor,  
635 T.M., and Ishiwata, S. (2009). Probing the mechanical architecture of the vertebrate meiotic  
636 spindle. *Nat Methods* 6, 167-172.
- 637 Kapitein, L.C., Peterman, E.J., Kwok, B.H., Kim, J.H., Kapoor, T.M., and Schmidt, C.F. (2005).  
638 The bipolar mitotic kinesin Eg5 moves on both microtubules that it crosslinks. *Nature* 435, 114-  
639 118.
- 640 Kapoor, T.M., and Mitchison, T.J. (2001). Eg5 is static in bipolar spindles relative to tubulin:  
641 evidence for a static spindle matrix. *J Cell Biol* 154, 1125-1133.
- 642 Kashina, A.S., Baskin, R.J., Cole, D.G., Wedaman, K.P., Saxton, W.M., and Scholey, J.M. (1996).  
643 A bipolar kinesin. *Nature* 379, 270-272.
- 644 Kwok, B.H., Kapitein, L.C., Kim, J.H., Peterman, E.J., Schmidt, C.F., and Kapoor, T.M. (2006).  
645 Allosteric inhibition of kinesin-5 modulates its processive directional motility. *Nat Chem Biol* 2,  
646 480-485.
- 647 Mastronarde, D.N., McDonald, K.L., Ding, R., and McIntosh, J.R. (1993). Interpolar spindle  
648 microtubules in PTK cells. *J Cell Biol* 123, 1475-1489.
- 649 McIntosh, J.R., Hepler, P.K., and Van Wie, D.G. (1969). Model for mitosis. *Nature* 224, 659-663.
- 650 McKenney, R.J., Vershinin, M., Kunwar, A., Vallee, R.B., and Gross, S.P. (2010). LIS1 and  
651 NudE induce a persistent dynein force-producing state. *Cell* 141, 304-314.
- 652 Mitchison, T.J. (2005). Mechanism and function of poleward flux in *Xenopus* extract meiotic  
653 spindles. *Philos Trans R Soc Lond B Biol Sci* 360, 623-629.
- 654 Mitchison, T.J., and Salmon, E.D. (2001). Mitosis: a history of division. *Nat Cell Biol* 3, E17-21.
- 655 Needleman, D.J., Groen, A., Ohi, R., Maresca, T., Mirny, L., and Mitchison, T. (2010). Fast  
656 microtubule dynamics in meiotic spindles measured by single molecule imaging: evidence that  
657 the spindle environment does not stabilize microtubules. *Mol Biol Cell* 21, 323-333.
- 658 Nicklas, R.B. (1997). How cells get the right chromosomes. *Science* 275, 632-637.
- 659 Oegema, K., and Mitchison, T.J. (1997). Rappaport rules: cleavage furrow induction in animal  
660 cells. *Proc Natl Acad Sci U S A* 94, 4817-4820.
- 661 Peter, S.J., and Mofrad, M.R. (2012). Computational modeling of axonal microtubule bundles  
662 under tension. *Biophys J* 102, 749-757.
- 663 Redemann, S., Baumgart, J., Lindow, N., Shelley, M., Nazockdast, E., Kratz, A., Prohaska, S.,  
664 Brugues, J., Furthauer, S., and Muller-Reichert, T. (2017). *C. elegans* chromosomes connect to  
665 centrosomes by anchoring into the spindle network. *Nat Commun* 8, 15288.
- 666 Salmon, E.D., Leslie, R.J., Saxton, W.M., Karow, M.L., and McIntosh, J.R. (1984). Spindle

- 667 microtubule dynamics in sea urchin embryos: analysis using a fluorescein-labeled tubulin and  
668 measurements of fluorescence redistribution after laser photobleaching. *J Cell Biol* 99, 2165-  
669 2174.
- 670 Sawin, K.E., LeGuellec, K., Philippe, M., and Mitchison, T.J. (1992). Mitotic spindle  
671 organization by a plus-end-directed microtubule motor. *Nature* 359, 540-543.
- 672 Scholey, J.M., Brust-Mascher, I., and Mogilner, A. (2003). Cell division. *Nature* 422, 746-752.
- 673 Shimamoto, Y., Forth, S., and Kapoor, T.M. (2015). Measuring Pushing and Braking Forces  
674 Generated by Ensembles of Kinesin-5 Crosslinking Two Microtubules. *Dev Cell* 34, 669-681.
- 675 Shimamoto, Y., and Kapoor, T.M. (2012). Microneedle-based analysis of the micromechanics of  
676 the metaphase spindle assembled in *Xenopus laevis* egg extracts. *Nat Protoc* 7, 959-969.
- 677 Shimamoto, Y., Maeda, Y.T., Ishiwata, S., Libchaber, A.J., and Kapoor, T.M. (2011). Insights into  
678 the micromechanical properties of the metaphase spindle. *Cell* 145, 1062-1074.
- 679 Skibbens, R.V., and Salmon, E.D. (1997). Micromanipulation of chromosomes in mitotic  
680 vertebrate tissue cells: tension controls the state of kinetochore movement. *Exp Cell Res* 235,  
681 314-324.
- 682 Takagi, J., Itabashi, T., Suzuki, K., Shimamoto, Y., Kapoor, T.M., and Ishiwata, S. (2014).  
683 Micromechanics of the vertebrate meiotic spindle examined by stretching along the pole-to-pole  
684 axis. *Biophys J* 106, 735-740.
- 685 Tan, R., Foster, P.J., Needleman, D.J., and McKenney, R.J. (2018). Cooperative Accumulation of  
686 Dynein-Dynactin at Microtubule Minus-Ends Drives Microtubule Network Reorganization. *Dev*  
687 *Cell* 44, 233-247.e234.
- 688 Torisawa, T., Ichikawa, M., Furuta, A., Saito, K., Oiwa, K., Kojima, H., Toyoshima, Y.Y., and  
689 Furuta, K. (2014). Autoinhibition and cooperative activation mechanisms of cytoplasmic dynein.  
690 *Nat Cell Biol* 16, 1118-1124.
- 691 Valentine, M.T., Fordyce, P.M., Krzysiak, T.C., Gilbert, S.P., and Block, S.M. (2006). Individual  
692 dimers of the mitotic kinesin motor Eg5 step processively and support substantial loads in vitro.  
693 *Nat Cell Biol* 8, 470-476.
- 694 Winey, M., Mamay, C.L., O'Toole, E.T., Mastronarde, D.N., Giddings, T.H., Jr., McDonald, K.L.,  
695 and McIntosh, J.R. (1995). Three-dimensional ultrastructural analysis of the *Saccharomyces*  
696 *cerevisiae* mitotic spindle. *J Cell Biol* 129, 1601-1615.
- 697 Yang, G., Cameron, L.A., Maddox, P.S., Salmon, E.D., and Danuser, G. (2008). Regional  
698 variation of microtubule flux reveals microtubule organization in the metaphase meiotic spindle.  
699 *J Cell Biol* 182, 631-639.
- 700 Yang, G., Houghtaling, B.R., Gaetz, J., Liu, J.Z., Danuser, G., and Kapoor, T.M. (2007).  
701 Architectural dynamics of the meiotic spindle revealed by single-fluorophore imaging. *Nat Cell*  
702 *Biol* 9, 1233-1242.
- 703 Zhang, D., and Nicklas, R.B. (1999). Micromanipulation of chromosomes and spindles in insect  
704 spermatocytes. *Methods Cell Biol* 61, 209-218.

705 **Figure Legends**

706 **Figure 1. Microneedle-based setup for analyzing *in-situ* spindle microtubule mechanics.**

707 (A) Schematic of the setup. Single metaphase spindles, assembled in *Xenopus* egg extracts and  
708 supplemented with X-rhodamine tubulin (20 nM) for microtubule motion tracking, can be  
709 subjected to a calibrated force (0.4–1.1 nN) via the microneedle tip (black double arrow).  
710 Microtubule motion responses can be analyzed by tracking fluorescent tubulin “speckles”  
711 incorporated into the filament lattices (red dots). (B) Representative confocal fluorescence image  
712 of a spindle, to which a microneedle tip (arrowhead) was inserted and an external force (double  
713 arrow) was applied. Yellow rectangle indicates the region for kymograph analysis. (C, D)  
714 Kymograph generated along the spindle pole-to-pole axis (C) and representative speckle  
715 trajectories (D), showing the motion of tubulin speckles in the absence of an external force. (E,  
716 F) An externally applied oscillatory force (frequency: 0.1 Hz; amplitude: 0.2 nN) could entrain  
717 this motion while maintaining the overall filament dynamics. Roman numbers above each trace  
718 correspond to those in the kymographs. Scale bars, 10  $\mu\text{m}$  (horizontal) and 10 s (vertical). (G)  
719 Amplitude of speckle motion response upon oscillatory force application was determined by  
720 sine-wave fitting of each trajectory and mapped onto a single imaging plane. Warmer color  
721 indicates larger response amplitude. Black circle with arrowheads, force application position and  
722 direction. (H, I) Cross-section of the motion amplitude profile along the long (H) and short (I)  
723 spindle axes. Speckle data within dotted rectangles in (G) (width: 5  $\mu\text{m}$ ) were projected onto  
724 each axis. Blue vertical line, spindle equator position.

725

726 **Figure 2. Microtubule arrays at the middle of the spindle half are less mechanically**  
727 **resistant to force than those near the pole and the equator.**

728 (A–C) Magnitude of speckle motion response depending on position along the long spindle axis,  
729 examined using an oscillatory force (0.1 Hz) applied near the spindle pole (A), at the middle of  
730 the spindle half (B), and near the equator (C). Data from multiple spindles (grey lines,  $n = 5$   
731 each) were each aligned at baseline, pooled and averaged at 1  $\mu\text{m}$  bin width (navy plots). Bars  
732 are S.D. Vertical bars in light blue, approximate equatorial position. (D) The averaged profiles in  
733 (A–C) were each normalized to the peak value and overlaid at the peak position. (E–G) The data  
734 in (A–C) were analyzed for speckles that located along the short spindle axis. (H) Normalized  
735 amplitude profiles of (E–G) generated as in (D). (I) Local effective stiffness at each spindle  
736 region, as estimated on the basis of each motion amplitude profile within  $\pm 5 \mu\text{m}$  from the peak  
737 (grey highlighted area in (A–C) and (E–G)). Data are mean  $\pm$  SD ( $n = 5$  each).  $*p < 0.05$   
738  $**p < 0.01$ , two-tailed Student's  $t$ -test. N.S., not significant. (J, K) Local mechanical properties of  
739 the spindle, measured by microrheology (see Fig. S2). Oscillatory forces were applied along the  
740 long spindle axis and at varied frequency (0.01–4 Hz) ( $n = 10$  at each spindle location). Dynamic  
741 stiffness (J) represents total mechanical resistance associated with viscous and elastic  
742 deformations. Phase shift (K) is a measure of how elastically ( $\theta = 0$ ) or viscously ( $\theta = \pi/2$  rad)  
743 the structure is deformed.

744

745 **Figure 3. Local mechanical responses of spindle microtubules are independent of filament**  
746 **polarity.**

747 (A) Two-dimensional heat maps showing the dependency of speckle motion amplitude on  
748 microtubule polarity. Speckles that had been moving toward the left and right spindle poles  
749 (tracked over  $\geq 10$  s) are analyzed for directionality and mapped in separate panels. Black circle,  
750 force application location (frequency: 0.1 Hz; amplitude: 0.25 nN). Warmer color indicates larger



751 amplitude response. Open circles in each map are the fraction of speckles that were assigned the  
752 opposite polarity. **(B)** Ratio of leftward- versus rightward-moving speckles (black squares and  
753 red circles, respectively) as a function of the position along the long spindle axis. Data from  $n =$   
754 4 spindle samples were pooled and averaged at each 5- $\mu\text{m}$  bin. Bars are SDs. **(C)** Individual  
755 speckle motion amplitude in **(A)** is projected along the long spindle axis. Speckles moving  
756 toward the left and right spindle poles are plotted in different symbols (blue squares and red  
757 circles, respectively). Other marks are as in Fig. 1. **(D)** Averaged motion amplitude of leftward-  
758 and rightward-moving speckles at different spindle location, obtained from  $n = 4$  spindles. Data  
759 as in **(C)** are pooled and averaged at each 5- $\mu\text{m}$  bin. Bars are SDs.

760

761 **Figure 4. Spindle length change is coupled with sliding of microtubule arrays nearer the**  
762 **pole.**

763 **(A)** Dual microneedle-based setup for examining microtubule motion dynamics associated with  
764 spindle length change. Microtubules were double-labeled with X-rhodamine-tubulin (red, 20  
765 nM) and Alexa 488-tubulin (green, 400 nM) for speckle imaging and spindle length  
766 measurement, respectively. One microneedle (M1) is used to pin down the spindle while the  
767 other (M2) can be moved at 100 nm/s to apply outward stretching force. **(B)** Confocal snapshots  
768 of a spindle before and during the course of a stretch. Merged images of labeled tubulins (red: X-  
769 rhodamine; green: Alexa 488) are shown. Chromosomes were also labeled with SYTOX green  
770 dye. Dotted lines indicate changes in microneedle tip positions. Scale bar, 10  $\mu\text{m}$ . **(C)**  
771 Kymograph generated along the spindle pole-to-pole axis in **(B)** (line width: 3  $\mu\text{m}$ ). Arrowheads,  
772 initial microneedle tip positions. Following the onset of microneedle movement ( $t = 0$ ), the  
773 spindle first underwent a brief period of parallel translocation (0–25 s, labeled “Trans”) and was

774 then stretched at a nearly constant velocity (25–135 s, labeled “Stretch”). Horizontal scale bar, 10  
775  $\mu\text{m}$ ; vertical scale bar, 20 s. **(D)** Time course of spindle-length change. Orange highlighted area  
776 indicates the period over which the spindle was stretched. Slope is 94 nm/s ( $R^2 = 0.98$ ) by linear  
777 regression. The following analyses were performed at the highlighted steady stretching phase.  
778 **(E)** Speckle motion response. Trajectories of individual speckles that could be tracked for  $\geq 10$  s  
779 were projected onto a single imaging plane. Grey ovals with broken and solid lines are  
780 approximate spindle positions at the onset and the end of stretch, respectively. **(F–I)** Speckle  
781 velocity analyzed before stretch **(F, G)** and during steady stretching phase **(H, I)**. Heat maps **(F,**  
782 **H)** were generated on the basis of the average velocity of individual tubulin speckles relative to  
783 spindle center and plotted at their initial position along the spindle axes. **(G, I)** Dependence of  
784 speckle velocity on the position along the long spindle axis. Histograms indicate overall velocity  
785 distribution of all the speckles analyzed. **(J)** Magnitude of the increase in average speckle  
786 velocity upon application of a stretching force as a function of the long-axis spindle position.  
787 Data obtained from  $n = 4$  spindles were pooled and averaged at every 0.1 relative spindle  
788 position bin. Grey lines are trends predicted from a simple multifilament array model **(K)** (see  
789 also Fig. S3C), which assumes that the predominant relative filament movement occurred evenly  
790 across the spindle (broken line), near the pole (solid line), or near the equator (dotted line).

791

792 **Figure 5. Effect of motor protein inhibition on the local mechanical responses of**  
793 **microtubules.**

794 Results of molecular perturbation assays with 1.5 mM AMPPNP ( $n = 3$ ) **(A–E)**, 10  $\mu\text{M}$  or 20  $\mu\text{M}$   
795 monastrol ( $n = 3$  and 5) **(F–J)**, and 1 mg/ml anti-dynein 70.1 antibody ( $n = 4$ ) **(K–O)**. **(A, F, K)**  
796 Representative confocal snapshots of spindles upon drug treatment. Local microtubule responses

797 were measured using an oscillatory force (0.1 Hz) at various spindle locations (indicated by  
798 white dotted lines). Average motion amplitude profiles were then generated along the long  
799 spindle axis measured near the spindle pole (**B, G, L**), at the middle of the spindle half (**C, H, M**),  
800 and at the equator (**D, I, N**). Averaged profiles from non-treated spindles are shown for  
801 comparison (black, corresponding to Fig. 2). (**E, J, O**) Local dynamic moduli were estimated on  
802 the basis of force and deformation magnitude within the  $\pm 5\text{-}\mu\text{m}$  area in each profile (grey). Data  
803 are mean  $\pm$  SD. All scale bars are 10  $\mu\text{m}$ . \* $p < 0.05$ , \*\* $p < 0.01$ , two-tailed Student's  $t$ -test. N.S.,  
804 not significant.

805

806 **Figure 6. Model for the local mechanical architecture of the spindle.**

807 **(A)** Schematic of the metaphase spindle. Open circles, microtubule minus-ends. Short  
808 antiparallel microtubules assemble near the equator, while parallel microtubules predominate  
809 nearer the pole. The ends of the equatorial and polar microtubule arrays overlap at the middle of  
810 the spindle half (highlighted in blue) and form parallel filament arrays, adapting to force  
811 associated with spindle-length change (dotted lines). The arrays at the pole and the equator are  
812 mechanically more robust and maintain their steady-state architecture against perturbing force  
813 (highlighted in orange). **(B)** Schematic of the molecular interactions involved in spindle  
814 micromechanics. Kinesin-5 (orange) localizes across spindle microtubules, pushing and resisting  
815 filament sliding to maintain the pole and equatorial dynamics, while its contribution to filament  
816 crosslinking at the middle of the spindle half is relatively small. Dynein (blue) localizes at the  
817 minus-ends of microtubules and mediates parallel filament interactions at the spindle pole and  
818 middle of the spindle half.

819

Takagi and Shimamoto, Figure 1

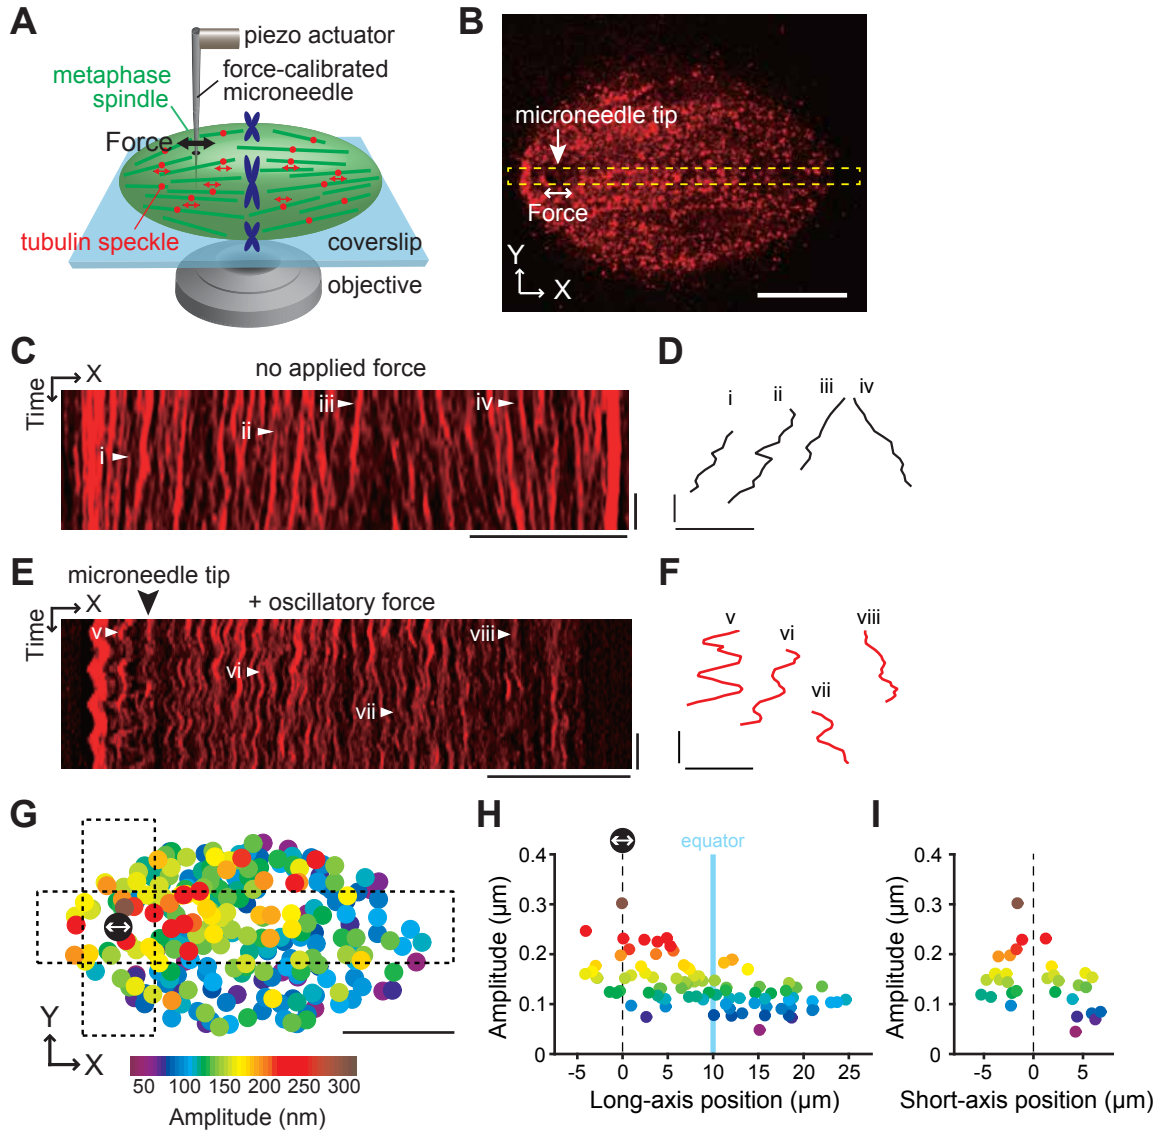

Takagi and Shimamoto, Figure 2

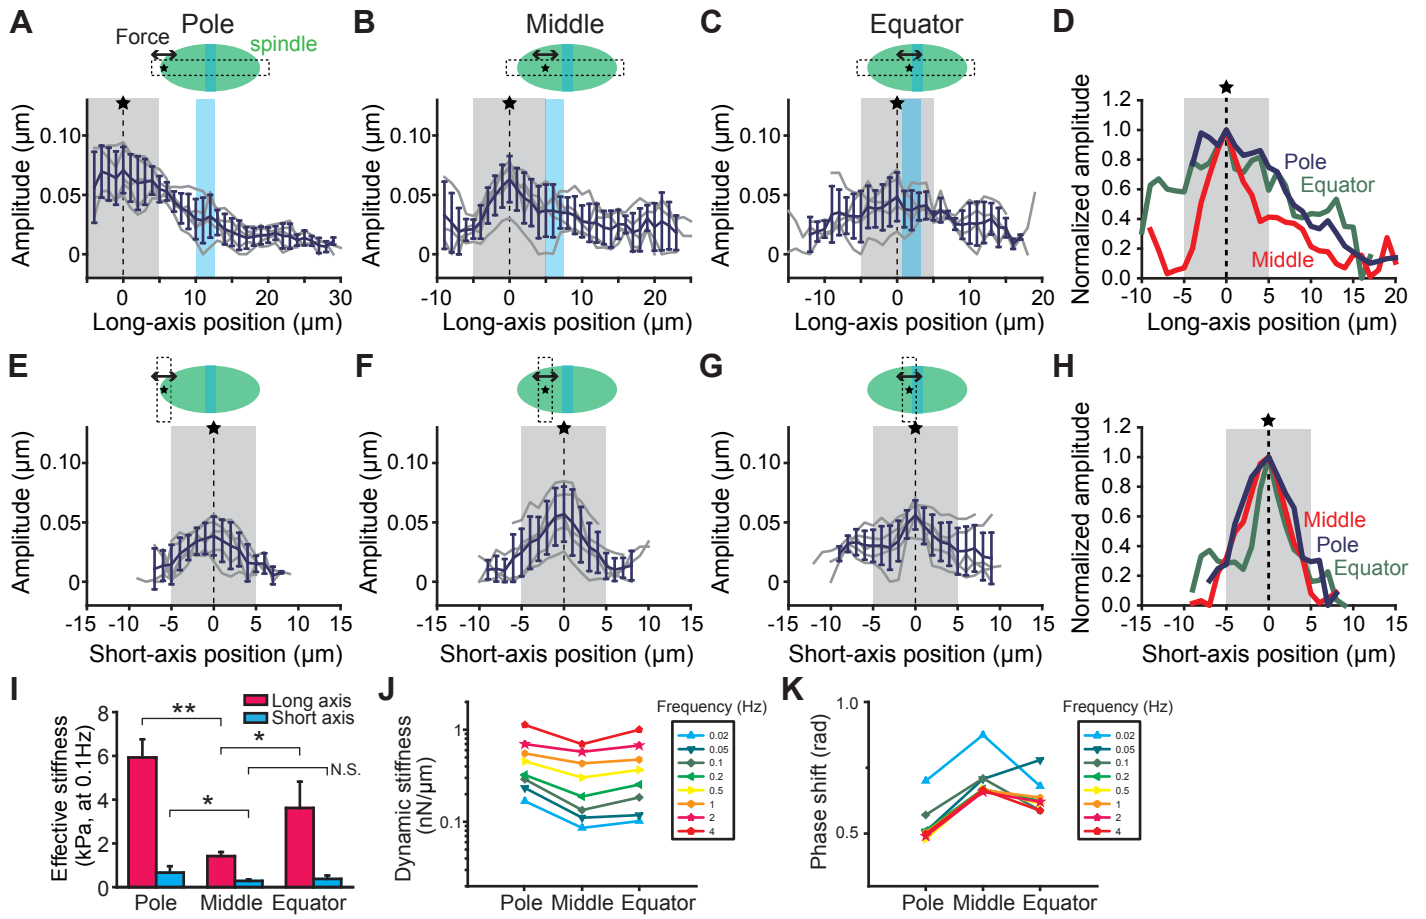

Takagi and Shimamoto, Figure 3

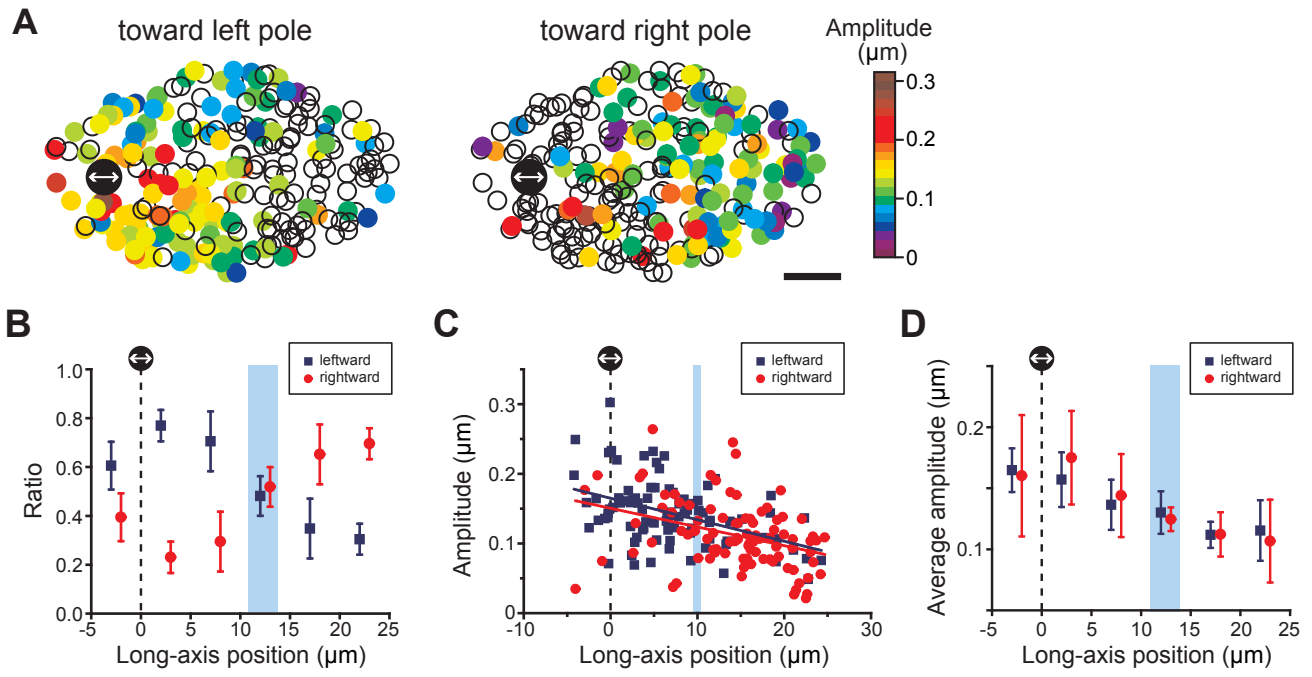

Takagi and Shimamoto, Figure 4

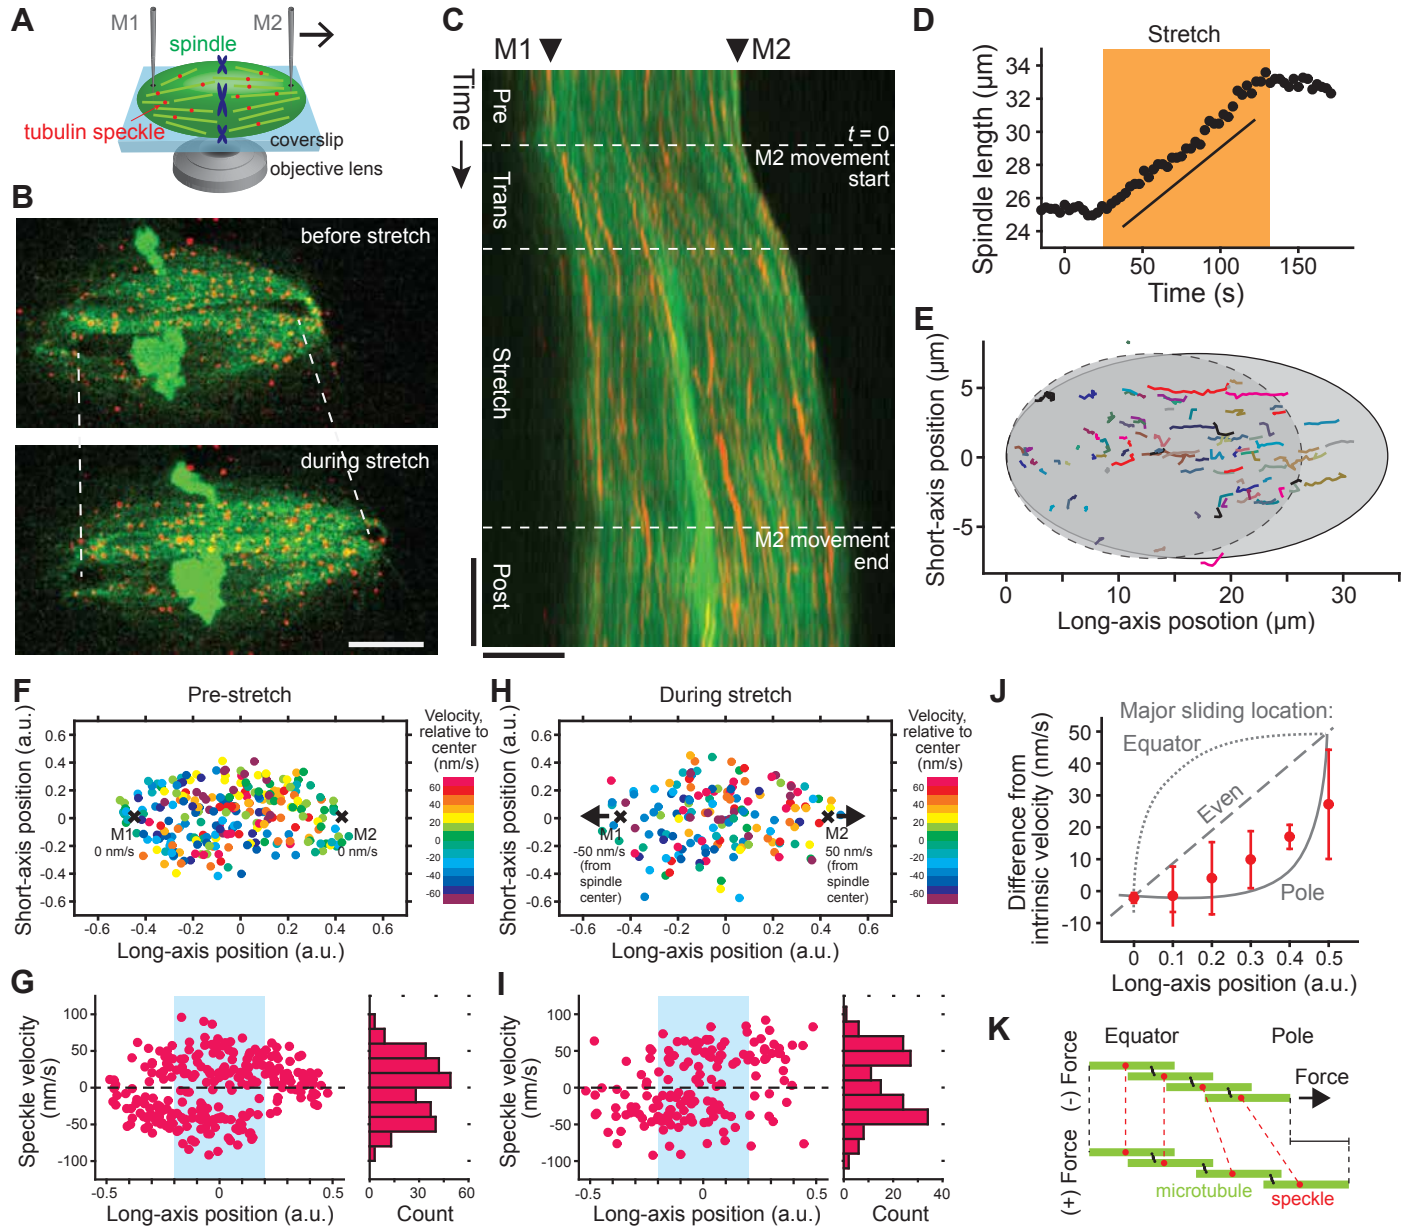



Takagi and Shimamoto, Figure 5

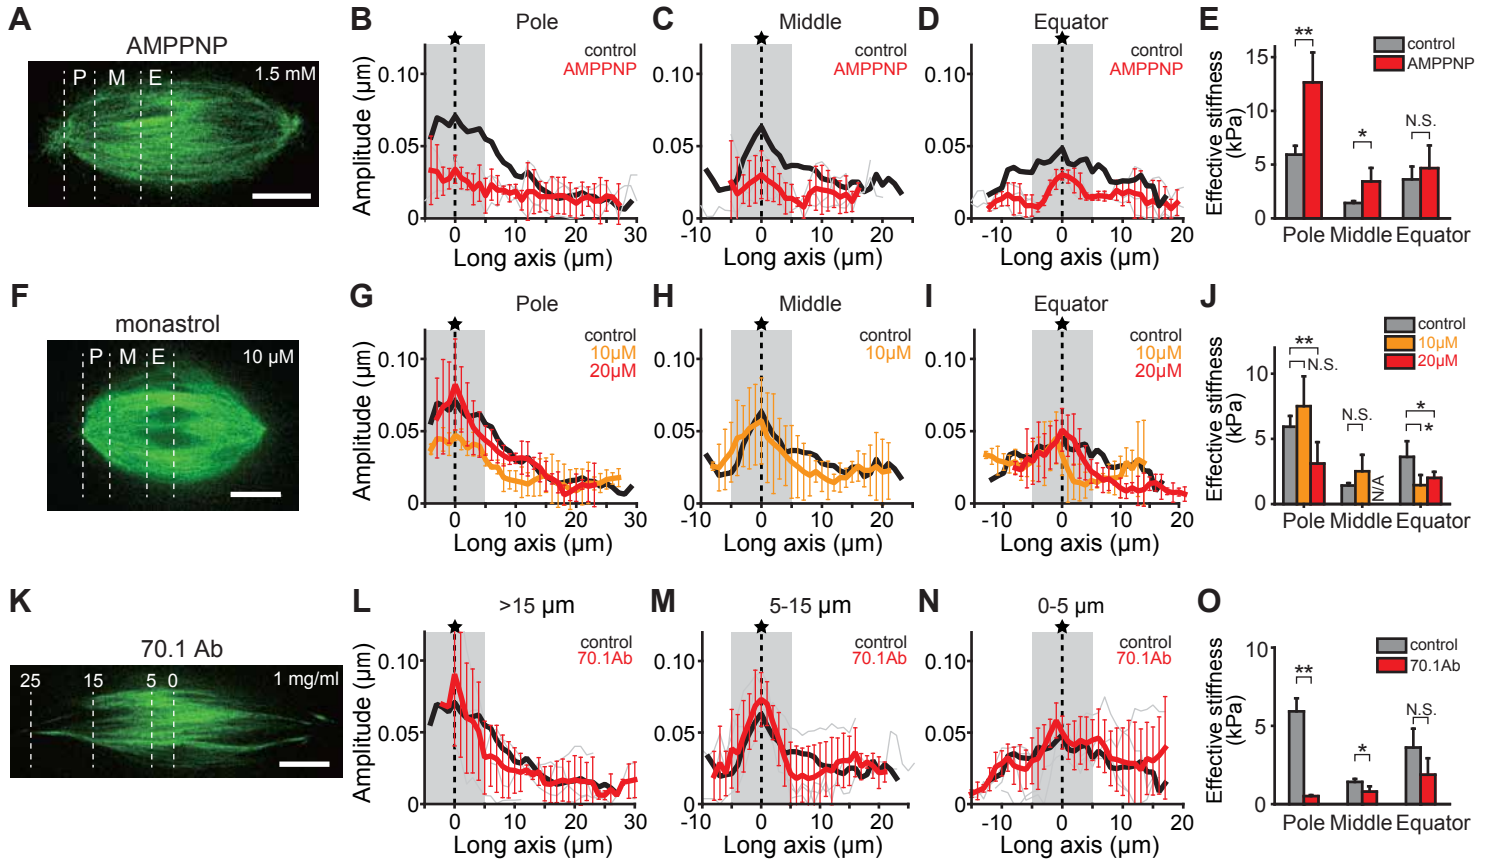



## Takagi and Shimamoto, Figure 6

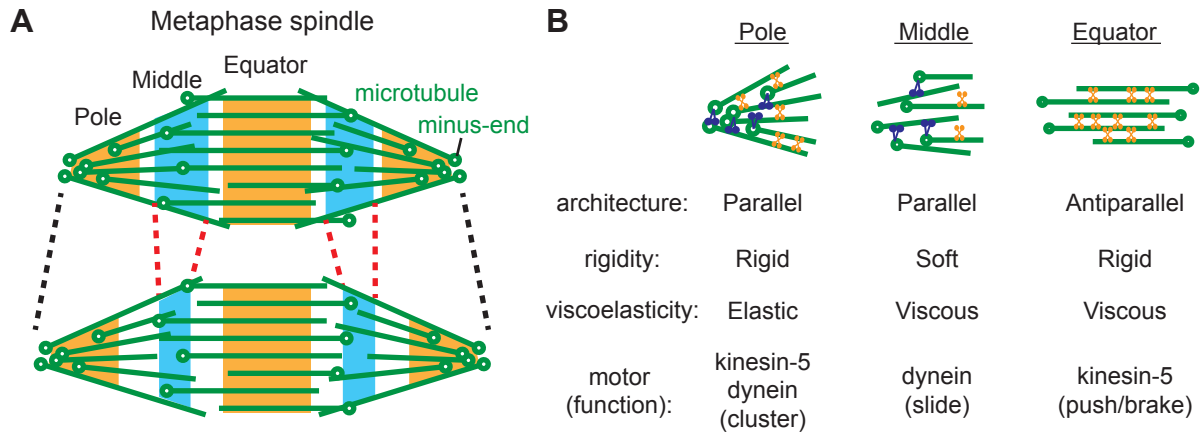

Source: https://www.biorxiv.org/content/10.1101/385633v1.full.pdf
